# Supplementary material for: Levels of per- and polyfluoroalkyl substances (PFAS) in various wastewater-derived fertilizers – analytical investigations from different perspectives
Source: Royal Society of Chemistry journal article supplement (doi:10.1039/d3va00178d), 2023-01-01
Supplement: d3va00178d1.pdf [file d3va00178d1.pdf]

**Supporting Information:**

**Levels of Per- and Polyfluoroalkyl Substances (PFAS) in  
various Wastewater-derived Fertilizers - Analytical  
investigations from different perspectives**

*Christian Vogel<sup>a\*</sup>, Philipp Roesch<sup>a</sup>, Philipp Wittwer<sup>a</sup>, Christian Piechotta<sup>a</sup>, Jan Lisec<sup>a</sup>, Thomas  
Sommerfeld<sup>a</sup>, Stephanie Kluge<sup>a</sup>, Hannes Herzel<sup>a</sup>, Thomas Huthwelker<sup>b</sup>, Camelia N. Borca<sup>b</sup>,  
Franz-Georg Simon<sup>a</sup>*

<sup>a</sup>Bundesanstalt für Materialforschung und -prüfung (BAM), Unter den Eichen 87, 12205 Berlin,  
Germany

<sup>b</sup>Paul Scherrer Institute, Swiss Light Sources, 5232 Villigen PSI, Switzerland

**Total SI-Tables: 4**

**Total SI-Figures: 1**

**Total SI-Pages: 9**

## Additional Materials and Methods

### *Sample extraction and preparation for quantitative EOF analysis by Roesch et al. 2022<sup>1</sup>*

Dried solid samples (1 g) were weighed directly in 50 ml centrifugal polypropylene (PP) tubes, followed by addition of 10 ml of a  $\text{NH}_3$  in MeOH (0.1 M) solution. After that, an established extraction process including sonication (15 min), followed by 30 min of vortexing ( $1500 \text{ min}^{-1}$ ) and subsequent centrifugation (5 min,  $4000 \text{ min}^{-1}$ ) was applied to the samples. In the next step the supernatant liquid was carefully decanted. Subsequently, the remaining residues were extracted in a second run using 10 ml of pure MeOH. After decanting the eluates, the combined solutions were carefully concentrated ( $\sim 2 \text{ ml}$ ) using a gentle constant flow of  $\text{N}_2$ . For SPE preparation, all samples were pH adjusted ( $\text{pH} = 4\text{-}5$ ) using 0.5 % formic acid and afterwards diluted to 15 ml with ultra-pure water and eventually centrifuged. All SPE cartridges were primed applying first 4 ml basic MeOH (0.3 %  $\text{NH}_3$ ), then 4 ml pure MeOH, followed by two subsequent 4 ml steps of ultra-pure water. After that, diluted samples were loaded on the solid phases maintaining a constant dripping rate of approx. 1 drop/s. Two washing steps were applied afterwards using 2 x 10 ml of aqueous ammonia solution (0.01 %) and 10 ml of deionized water. Subsequent application of a constant vacuum ( $\sim 40 \text{ mbar}$ ) for approx. 30 min, lead to cautious drying of the loaded SPE cartridges. After that, all cartridges were firstly eluted upon slow addition of 2 x 2 ml pure MeOH, followed by three-time addition of 2 ml basic MeOH (0.3 %  $\text{NH}_3$ ) into 15 ml PP vials. Eventually, all SPE cartridges were eluted with 4 ml hexanes, followed by 4 ml of acetone and collected in fresh 15 ml PP vials. Both separated eluates were slowly evaporated to dryness by  $\text{N}_2$  gas and subsequently reconstituted in 2 mL of fresh MeOH. Finally, both eluates were analyzed by CIC and the values summed up.

### *LC-MS/MS QA/QC*

The isotopically labelled internal standard species were obtained from Wellington Laboratories as a prepared solution with a concentration of  $50 \mu\text{g mL}^{-1}$  with an uncertainty of  $\pm 2.5 \%$ . For quality assurance and control an independent certified reference material (Chiron) containing all target PFAS with a concentration of  $5 \mu\text{g mL}^{-1}$  with an uncertainty of  $\pm 5 \%$  was used. All organic solvents, reagents, and modifier used for extraction and for LC-MS/MS analysis were tested with respect to a possible blank value. All dilution and spiking steps were gravimetrically controlled.

**Table S1:** EOF values of various sewage sludge and wastewater-based fertilizer samples; \* taken from (Roesch et al. 2022); From SSA4 and SS5 two samples out of the triplicate were negative after blank correction and hence, values were omitted.

|                  | EOF (µg/kg)     |
|------------------|-----------------|
| <b>SL1*</b>      | 7209.4 ± 1748.6 |
| <b>SL2</b>       | 537.6 ± 125.3   |
| <b>SL3</b>       | 429.7 ± 19.3    |
| <b>SL4*</b>      | 421.2 ± 76.6    |
| <b>SL5*</b>      | 357.4 ± 81.6    |
| <b>SL6*</b>      | 256.1 ± 16.9    |
| <b>SL7</b>       | 243.7 ± 44.1    |
| <b>SL8*</b>      | 173.1 ± 12.7    |
| <b>SL9</b>       | 162.1 ± 101.8   |
| <b>SL10*</b>     | 154.3 ± 21.7    |
| <b>SSA1</b>      | 121.6 ± 37.6    |
| <b>SSA2</b>      | 92.9 ± 58.3     |
| <b>SSA3</b>      | 89.9 ± 30.4     |
| <b>SSA4</b>      | 87.3            |
| <b>SSA5</b>      | 84.6            |
| <b>SSA6</b>      | <LOQ            |
| <b>TT1</b>       | 88.8 ± 2.4      |
| <b>TT2</b>       | 82.1 ± 37.5     |
| <b>TT3</b>       | 77.8 ± 21.4     |
| <b>TT4</b>       | <LOQ            |
| <b>TT5</b>       | <LOQ            |
| <b>TT6</b>       | <LOQ            |
| <b>LTC1</b>      | <LOQ            |
| <b>LTC2</b>      | <LOQ            |
| <b>Struvite1</b> | 112.1 ± 8.7     |
| <b>Struvite2</b> | 96.2 ± 14.4     |

**Table S2:** Comparison EOF vs. PFAS DGT. From SL2, SL8 and SSA1 one sample each (DGT) was negative after blank correction, hence, values were omitted

|                  | EOF (µg/kg)     | DGT PFAS-F (ng) |
|------------------|-----------------|-----------------|
| <b>SL1</b>       | 7209.4 ± 1748.6 | 2.25 ± 0.30     |
| <b>SL2</b>       | 537.6 ± 125.3   | 0.42            |
| <b>SL3</b>       | 429.7 ± 19.3    | 0.09 ± 0.02     |
| <b>SL5</b>       | 357.4 ± 81.6    | 0.15 ± 0.05     |
| <b>SL7</b>       | 243.7 ± 44.1    | 0.15 ± 0.00     |
| <b>SL8</b>       | 173.1 ± 12.7    | 0.22            |
| <b>SSA1</b>      | 121.6 ± 37.6    | 0.22            |
| <b>SSA2</b>      | 92.9 ± 58.3     | <LOQ            |
| <b>TT3</b>       | 77.8 ± 21.4     | 0.07 ± 0.00     |
| <b>Struvite1</b> | 112.1 ± 8.7     | <LOQ            |
| <b>Struvite2</b> | 96.2 ± 14.4     | 0.08 ± 0.01     |

66 **Table S3:** Targeted analysis by LC-MS/MS of selected PFAS (in µg/kg); n. d. (not detected)

|                   | <b>SL1</b>  | <b>SL4</b>   | <b>SL5</b>   | <b>SL6</b>   | <b>SL8</b>   | <b>SL10</b>  |
|-------------------|-------------|--------------|--------------|--------------|--------------|--------------|
| <b>PFBA</b>       | 3.8 ± 0.3   | 1.8 ± 0.1    | 1.9 ± 0.0    | 5.7 ± 0.3    | 0.6 ± 0.1    | 1.3 ± 0.2    |
| <b>PFPeA</b>      | 45.4 ± 1.9  | n.d.         | n.d.         | 1.8 ± 0.5    | 0.3          | 0.6          |
| <b>PFHxA</b>      | 34.6 ± 0.3  | 5.9 ± 0.2    | 4.5 ± 0.8    | 18.6 ± 1.5   | 5.1 ± 2.4    | 6.4 ± 1.0    |
| <b>PFHpA</b>      | n.d.        | n.d.         | n.d.         | n.d.         | n.d.         | n.d.         |
| <b>PFOA</b>       | 3.3 ± 0.4   | 3.6 ± 1.1    | 4.1 ± 1.0    | 5.7 ± 0.2    | 2.8 ± 0.6    | 3.3 ± 0.5    |
| <b>PFNA</b>       | n.d.        | n.d.         | n.d.         | n.d.         | n.d.         | n.d.         |
| <b>PFDA</b>       | 1.8 ± 0.1   | 0.2 ± 0.2    | 3.8 ± 0.7    | 1.1 ± 0.2    | 0.5 ± 0.0    | 1.3 ± 0.3    |
| <b>PFBS</b>       | 5.9 ± 0.3   | 4.9 ± 0.1    | 5.9 ± 0.3    | 5.2 ± 0.1    | 6.1 ± 0.2    | 4.5 ± 0.3    |
| <b>PFHxS</b>      | 1.8 ± 0.0   | 1.4 ± 0.0    | 2.3 ± 0.4    | 1.4 ± 0.1    | 1.6 ± 0.1    | 1.6 ± 0.2    |
| <b>PFOS</b>       | 7.7 ± 0.5   | 4.1 ± 0.1    | 6.1 ± 0.1    | 18.5 ± 0.2   | 2.4 ± 0.1    | 3.4 ± 0.4    |
| <b>Sum Target</b> | 104.3 ± 2.1 | 21.8 ± 1.1   | 28.5 ± 1.5   | 58.0 ± 1.6   | 19.6 ± 2.5   | 22.3 ± 1.3   |
| <b>EOF</b>        | 7209 ± 1748 | 421.2 ± 76.6 | 357.4 ± 81.6 | 256.1 ± 16.9 | 173.1 ± 12.7 | 154.3 ± 21.7 |

67

68

69

70

71

**Table S4:** Results from suspect screening of the EOF extract from SL1

| Group           | Name                                   | Formula     | Retention time | Observed m/z | Intensity |
|-----------------|----------------------------------------|-------------|----------------|--------------|-----------|
| PFCA (C4-C7)    | 2,3,3,4,4,4-Hexafluorobutanoic acid    | C4H2F6O2    | 1.477          | 194.99352    | 81        |
| PFCA (C4-C7)    | Perfluorobutanoic acid                 | C4HF7O2     | 1.803          | 212.98203    | 9         |
| PFCA (C4-C7)    | PFCA-H; C5H2F8O2                       | C5H2F8O2    | 1.994          | 244.99001    | 315       |
| PFCA (C4-C7)    | PFCA-H; C6H5F7O3                       | C6H5F7O3    | 3.241          | 257.00537    | 184       |
| PFCA (C4-C7)    | PFCA-diether_Hsubstituted; C5H2F8O4    | C5H2F8O4    | 2.024          | 276.97424    | 1952      |
| PFCA (C4-C7)    | 3-(Perfluorobutyl)propanoic acid       | C7H5F9O2    | 4.286          | 291.00787    | 366       |
| PFCA (C4-C7)    | PFCA-H; C6H2F10O2                      | C6H2F10O2   | 2.316          | 294.98871    | 55        |
| PFCA (C4-C7)    | Perfluorohexanoic acid                 | C6HF11O2    | 2.74           | 312.97717    | 151       |
| PFCA (C4-C7)    | PFCA-H; C7H3F9O4                       | C7H3F9O4    | 4.662          | 320.98083    | 220       |
| PFCA (C4-C7)    | PFCA-H; C7H2F12O2                      | C7H2F12O2   | 2.485          | 344.98318    | 56        |
| PFCA (C4-C7)    | PFCA-perfluoroalkyl_branched; C7HF13O2 | C7HF13O2    | 3.192          | 362.97394    | 19        |
| PFCA (C8-C10)   | 53FTA                                  | C8H5F11O2   | 3.234          | 341.00659    | 504       |
| PFCA (C8-C10)   | PFCA-H; C8H5F11O3                      | C8H5F11O3   | 2.896          | 357.00262    | 276       |
| PFCA (C8-C10)   | Perfluorooctanoic acid                 | C8HF15O2    | 3.607          | 412.97229    | 252       |
| PFCA (C8-C10)   | PFCA-H; C9H2F16O2                      | C9H2F16O2   | 3.266          | 444.97824    | 77        |
| PFCA (C8-C10)   | PFCA-H; C10H2F18O2                     | C10H2F18O2  | 0.121          | 494.97598    | 25        |
| PFCA (C8-C10)   | Perfluorodecanoic acid                 | C10HF19O2   | 4.404          | 512.96625    | 53        |
| PFSA            | FT-PFSA; C5H5F7O3S                     | C5H5F7O3S   | 2.129          | 276.9765     | 400       |
| PFSA            | PFSA-H; C5H2F8O4S                      | C5H2F8O4S   | 2.306          | 308.94522    | 532       |
| PFSA            | Perfluorooctanesulfonic acid           | C8HF17O3S   | 4.009          | 498.94046    | 1780      |
| PAPs            | PFAP-FT_PAP; C4H6F5O3P                 | C4H6F5O3P   | 2.813          | 226.99152    | 292       |
| PAPs            | PFAP-diPAP; C2HF6O4P                   | C2HF6O4P    | 2.397          | 232.94884    | 665       |
| PAPs            | PFAP-FT_diPAP; C6H9F6O4P               | C6H9F6O4P   | 4.286          | 289.01077    | 1747      |
| Pesticide       | Fludioxonil                            | C12H6F2N2O2 | 3.267          | 247.03737    | 493       |
| Pesticide       | Flufenacet ESA                         | C11H14FNO4S | 2.863          | 274.05988    | 156       |
| Pharmaceuticals | Flufenamic acid                        | C14H10F3NO2 | 3.442          | 280.06329    | 661       |

|                 |                                                                                      |            |       |           |      |
|-----------------|--------------------------------------------------------------------------------------|------------|-------|-----------|------|
| Pharmaceuticals | Pitavastatin                                                                         | C25H24FNO4 | 4.334 | 420.16705 | 234  |
| FCA             | 4,4'-Difluorobenzophenone                                                            | C13H8F2O   | 3.899 | 217.04753 | 1801 |
| FCA             | 1-cyclopropyl-6,7-difluoro-1,4-dihydro-8-hydroxy-4-oxo-3-Quinoline-3-carboxylic acid | C13H9F2NO4 | 1.825 | 280.03494 | 501  |
| PFFA            | 2-(Perfluorohexyl)ethylphosphonic acid                                               | C8H6F13O3P | 3.58  | 426.97366 | 338  |
| Other           | FT-thioether; C6H7F5O2S                                                              | C6H7F5O2S  | 3.234 | 237.00038 | 273  |
| Other           | 3,3,4,4,5,5,6,6,6-Nonafluorohexene                                                   | C6H3F9     | 1.739 | 245.00185 | 290  |
| Other           | Perfluorovaleraldehyde                                                               | C5HF9O     | 2.733 | 246.98608 | 137  |
| Other           | HFPO-DA, 2,3,3,3-Tetrafluoro-2-(pentafluoroethoxy)propanoic acid                     | C5HF9O3    | 2.031 | 278.96927 | 366  |
| Other           | Perfluoroheptanal; 1,1,2,2,3,3,4,4,5,5-Decafluoro-1-((trifluorovinyl)oxy)pentane     | C7HF13O    | 3.607 | 346.97931 | 442  |
| Other           | (Perfluorododecyl)ethylene                                                           | C14H3F25   | 4.63  | 644.97241 | 763  |

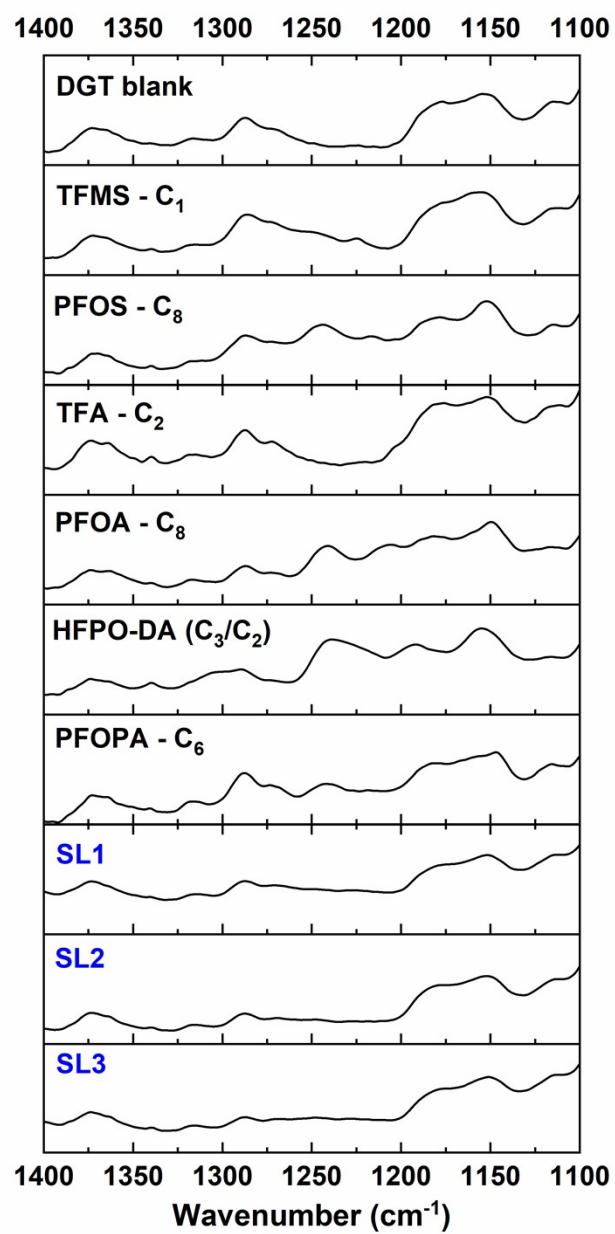

**Figure S1:** Raw FT-IR spectra of the applied DGT binding layers.

76 **References:**

- 77 1. P. Roesch, C. Vogel, T. Huthwelker, P. Wittwer and F.-G. Simon, Investigation of per- and polyfluoroalkyl  
78 substances (PFAS) in soils and sewage sludges by fluorine K-edge XANES spectroscopy and combustion  
79 ion chromatography *Environmental Science and Pollution Research*, 2022, **29**, 26889-26899,  
80 <https://doi.org/10.1007/s11356-021-17838-z>.  
81
